# Supplementary material for: Protein microarrays guide tolerizing DNA vaccine treatment of autoimmune encephalomyelitis
Source: Springer Nature journal article supplement (doi:10.1038/nbt859), 2003-08-08
Supplement: 41587_2003_BFnbt859_MOESM1_ESM.pdf [file 41587_2003_BFnbt859_MOESM1_ESM.pdf]

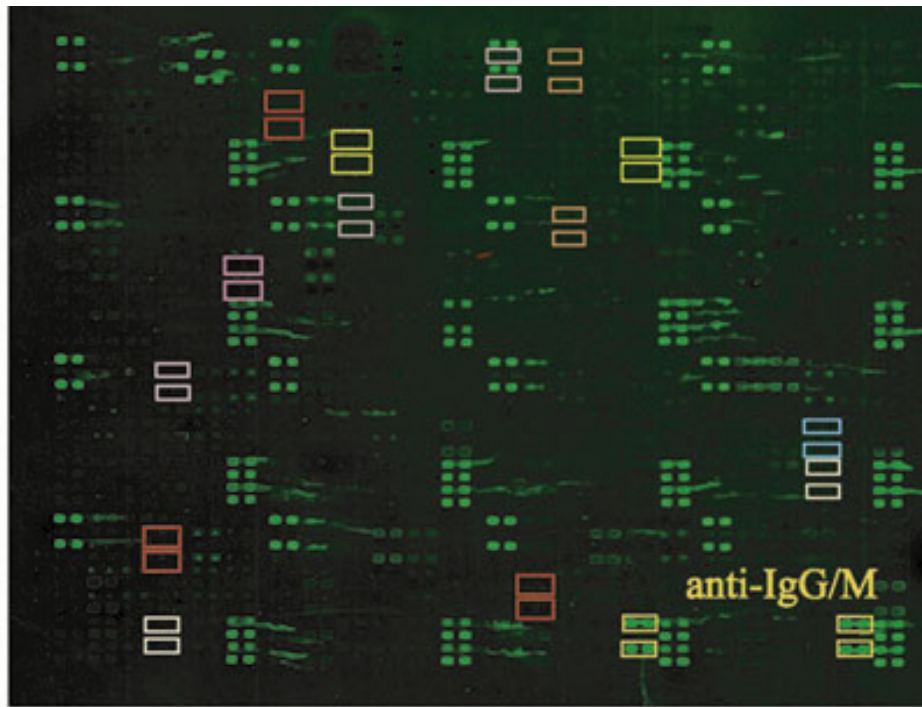

A

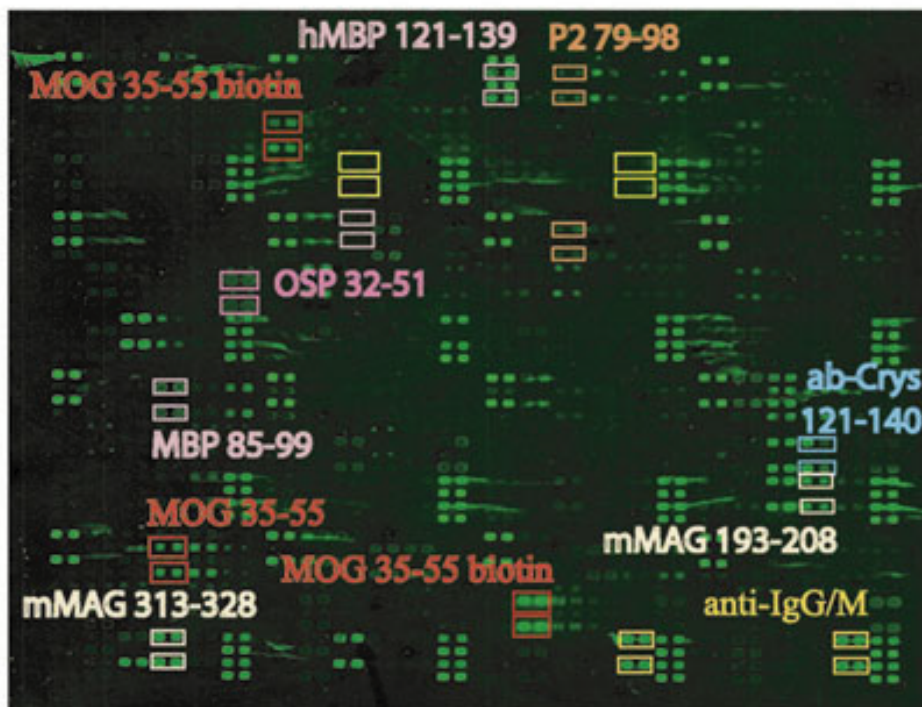

B

**Supplementary Figure 1** Myelin arrays demonstrate autoantibody reactivity against MAG epitopes in EAE. Myelin arrays were probed with sera from an SJL mouse induced to develop EAE with PLP<sub>139-151</sub> (a) and healthy SJL control (b) sera. Reactive antigen features are highlighted.
