# Supplementary material for: Protein microarrays guide tolerizing DNA vaccine treatment of autoimmune encephalomyelitis
Source: Springer Nature journal article supplement (doi:10.1038/nbt859), 2003-08-08
Supplement: 41587_2003_BFnbt859_MOESM2_ESM.pdf [file 41587_2003_BFnbt859_MOESM2_ESM.pdf]

## Supplementary Methods

Myelin proteome arrays contained subsets of the following proteins and peptides:

A1 MBP 68-86  
A2 PLP 139-151  
A4 rMBP 32-47  
A5 MBP 68-86  
A7 MBP 87-99  
A8 rMBP 42-52  
A9 rMBP 35-52  
A11 P2 86-99  
A12 gpSpChHomog  
A13 P2 65-89  
A14 P2 26-48  
A15 MBP 89-101 91Ala  
A16 bP2 49-64  
A17 MBP 35-47  
A18 gpMBP  
A19 hMBP 84-101  
A20 hMBP 87-99  
A21 MBP 87-99  
A22 MBP 87-99  
A23 hMBP 83-99  
A24 hMBP 87-99  
A25 hMBP 87-99  
A30 Tetanus and diphtheria toxoids  
A41 gpMBP protein  
A56 Pertussis toxin 133-146  
A57 bP2 protein  
A58 rMBP 1-16 Ac  
A59 rMBP 14-27  
A60 MBP 24-37  
A61 MBP 53-78  
A62 MBP 71-90  
A63 MBP 87-99  
A64 hMBP 87-95  
A65 hMBP 141-150  
A66 rMBP 10-20  
A67 MBP 20-37  
A68 rMBP 30-47  
A69 MBP 30-52  
A70 MBP 68-86  
A71 MBP 89-97  
A72 MBP 89-100  
A73 MBP 89-102  
A74 hMBP 11-29  
A75 hMBP 21-39

A76 hMBP 31-49  
A77 hMBP 61-79  
A78 hMBP 71-89  
A79 hMBP 81-99  
A80 hMBP 91-100  
A81 hMBP 101-119  
A82 hMBP 111-129  
A83 hMBP 121-139  
A84 hMBP 131-149  
A85 hMBP 141-159  
A86 hMBP 151-170  
A87 MBP 85-99  
A88 gpMBP protein  
A89 bPNS myelin  
A90 hMBP protein  
A91 hMBP protein  
A93 MBP 1-11  
A94 mMBP 1-22  
A95 ACHR 279-291  
A96 MOG 35-55  
A97 MOG 35-55  
A98 HSP 180-188  
A99 EYYK  
A112 mP2 1-16  
A113 mP2 16-37  
A114 mP2 37-56  
A115 mP2 79-98  
A116 mP2 92-106  
A117 mP2 116-131  
A118 P2 61-72  
A138 PLP 178-191  
A139 MBP 1-11 Ac  
A140 MBP 85-99  
A141 MOG 35-55  
A142 MOG 91-106  
A144 MOG 35-55  
A177 MOG protein  
A193 MOG protein  
A205 MOG protein  
A298 MBP 85-99  
A300 PLP 1-19  
A301 PLP 10-29  
A302 PLP 110-129  
A303 PLP 210-229  
A304 PLP 30-49  
A305 PLP 50-69  
A306 PLP 80-99  
A307 PLP 91-110

A308 PLP 110-189  
A309 PLP 120-139  
A310 PLP 150-169  
A311 PLP 161-180  
A312 PLP 180-199  
A313 PLP 190-209  
A314 PLP 130-149  
A315 PLP 200-219  
A316 PLP 250-269  
A317 PLP 260-276  
A325.1 PLP protein (glycerol)  
A325.2 PLP protein (30% DMF)  
A325.3 PLP protein (20% DMF)  
A326 PLP 139-151  
A327 PLP 103-116  
A328 PLP 140-159  
A329 PLP 158-166  
A330 MBP 89-101  
A331 MBP 13-21  
A332 MBP 83-99  
A333 MBP 111-129  
A334 MBP 131-155  
A335 MBP 146-170  
A336 PLP 89-106  
A337 PLP 139-154  
A338 PLP 178-197  
A339 MOG 35-55  
A340 MOG 11-30  
A341 MOG 21-40  
A342 CNPase 343-373  
A343 CNPase 356-388  
A344 MOBP 21-39  
A345 MOBP 31-49  
A347 MOG 1-20  
A348 hMOG 1-26  
A349 hMOG 14-39  
A350 hMOG 27-50  
A351 hMOG 38-60  
A352 hMOG 50-74  
A353 hMOG 63-87  
A354 hMOG 76-100  
A355 hMOG 89-113  
A356 hMOG 101-125  
A357 hMOG 162-178  
A358 hMOG 168-182  
A359 hMOG 63-75  
A360 hMOG 64-76  
A361 hMOG 65-77

A362 hMOG 66-78  
A363 hMOG 67-79  
A364 hMOG 68-80  
A365 hMOG 69-81  
A366 hMOG 70-82  
A367 hMOG 71-83  
A368 hMOG 72-84  
A369 hMOG 73-85  
A370 hMOG 74-86  
A371 hMOG 75-87  
A372 hMBP 6-14  
A373 hMBP 7-15  
A374 hMBP 13-21  
A375 hMBP 14-22  
A376 hMBP 15-23  
A377 hMBP 20-28  
A378 hMBP 21-29  
A379 hMBP 29-37  
A380 hMBP 79-87  
A381 hMBP 86-94  
A382 hMBP 90-98  
A383 hMBP 110-118  
A384 hMBP 112-120  
A385 hMBP 136-144  
A386 hMBP 145-153  
A387 hMBP 148-156  
A388 hMBP 149-157  
A389 hMBP 150-158  
A390 hMBP 1-20  
A391 hMBP 80-102  
A392 hMBP 108-128  
A393 hMBP 131-153  
A394 hMBP 142-167  
A395 hAChR 60-80  
A396 rMOG 1-18  
A397 rMOG 7-24  
A398 rMOG 13-30  
A399 rMOG 19-36  
A400 rMOG 25-42  
A401 rMOG 31-48  
A402 rMOG 37-54  
A403 rMOG 43-60  
A404 rMOG 49-66  
A405 rMOG 55-72  
A406 rMOG 61-78  
A407 rMOG 67-84  
A408 rMOG 73-90  
A409 rMOG 79-96

A410 rMOG 85-102  
A411 rMOG 91-108  
A412 rMOG 97-114  
A414 rMOG 109-126  
A415 rMOG 79-90  
A416 rMBP 63-88  
A417 rMBP 71-79  
A418 rMBP 71-83  
A419 rMBP 72-84  
A420 gpMBP 63-88  
A421 gpMBP 71-79  
A422 gpMBP 72-85  
A423 mMOG 79-96  
A594 PLP 89-106 biotin  
A597 CNPase 343-373 biotin  
A598 CNPase 356-373 biotin  
A599 CNPase 356-388 biotin  
A600 CNPase 343-355 biotin  
A601 CNPase 374-388 biotin  
A602 CNPase 343-373  
A603 CNPase 356-373  
A604 CNPase 356-388  
A605 CNPase 343-355  
A606 CNPase 374-388  
A608 MBP protein  
A625 PLP 139-151 reverse  
A626 PLP 178-191  
A628 CNPase 343-373 Ac  
A629 PLP 89-106 biotin  
A630 MOG 91-106  
A631 CNPase 343-355  
A632 CNPase 374-388  
A634 CNPase 356-373  
A640 CNPase 343-373 biotin  
A641 MOG 91-106  
A642 CNPase 356-388 biotin  
A643 CNPase 343-355 biotin  
A644 CNPase 374-388 biotin  
A657 abCrys 16-35  
A659 abCrys 26-45  
A660 abCrys 46-65  
A661 abCrys 61-75  
A662 abCrys 61-80  
A663 abCrys 66-85  
A664 abCrys 71-90  
A665 abCrys 76-95  
A666 abCrys 86-105  
A667 abCrys 96-115

A668 abCrys 106-125  
A669 abCrys 116-135  
A670 abCrys 121-140  
A672 abCrys 131-150  
A673 abCrys 134-153  
A674 abCrys 146-165  
A675 abCrys protein
